# Supplementary material for: Towards a better understanding of the psychosocial determinants associated with adults’ use of smokeless tobacco in the Jazan Region of Saudi Arabia: a qualitative study
Source: PubMed Central journal article supplement (PMC9006419; doi:10.1186/s12889-022-13120-0), 2022-04-13

**Figure 1. Communal Coding Tree for the Psychosocial Determinants of Adults' Shammah Usage in Jazan Region, Saudi Arabia**

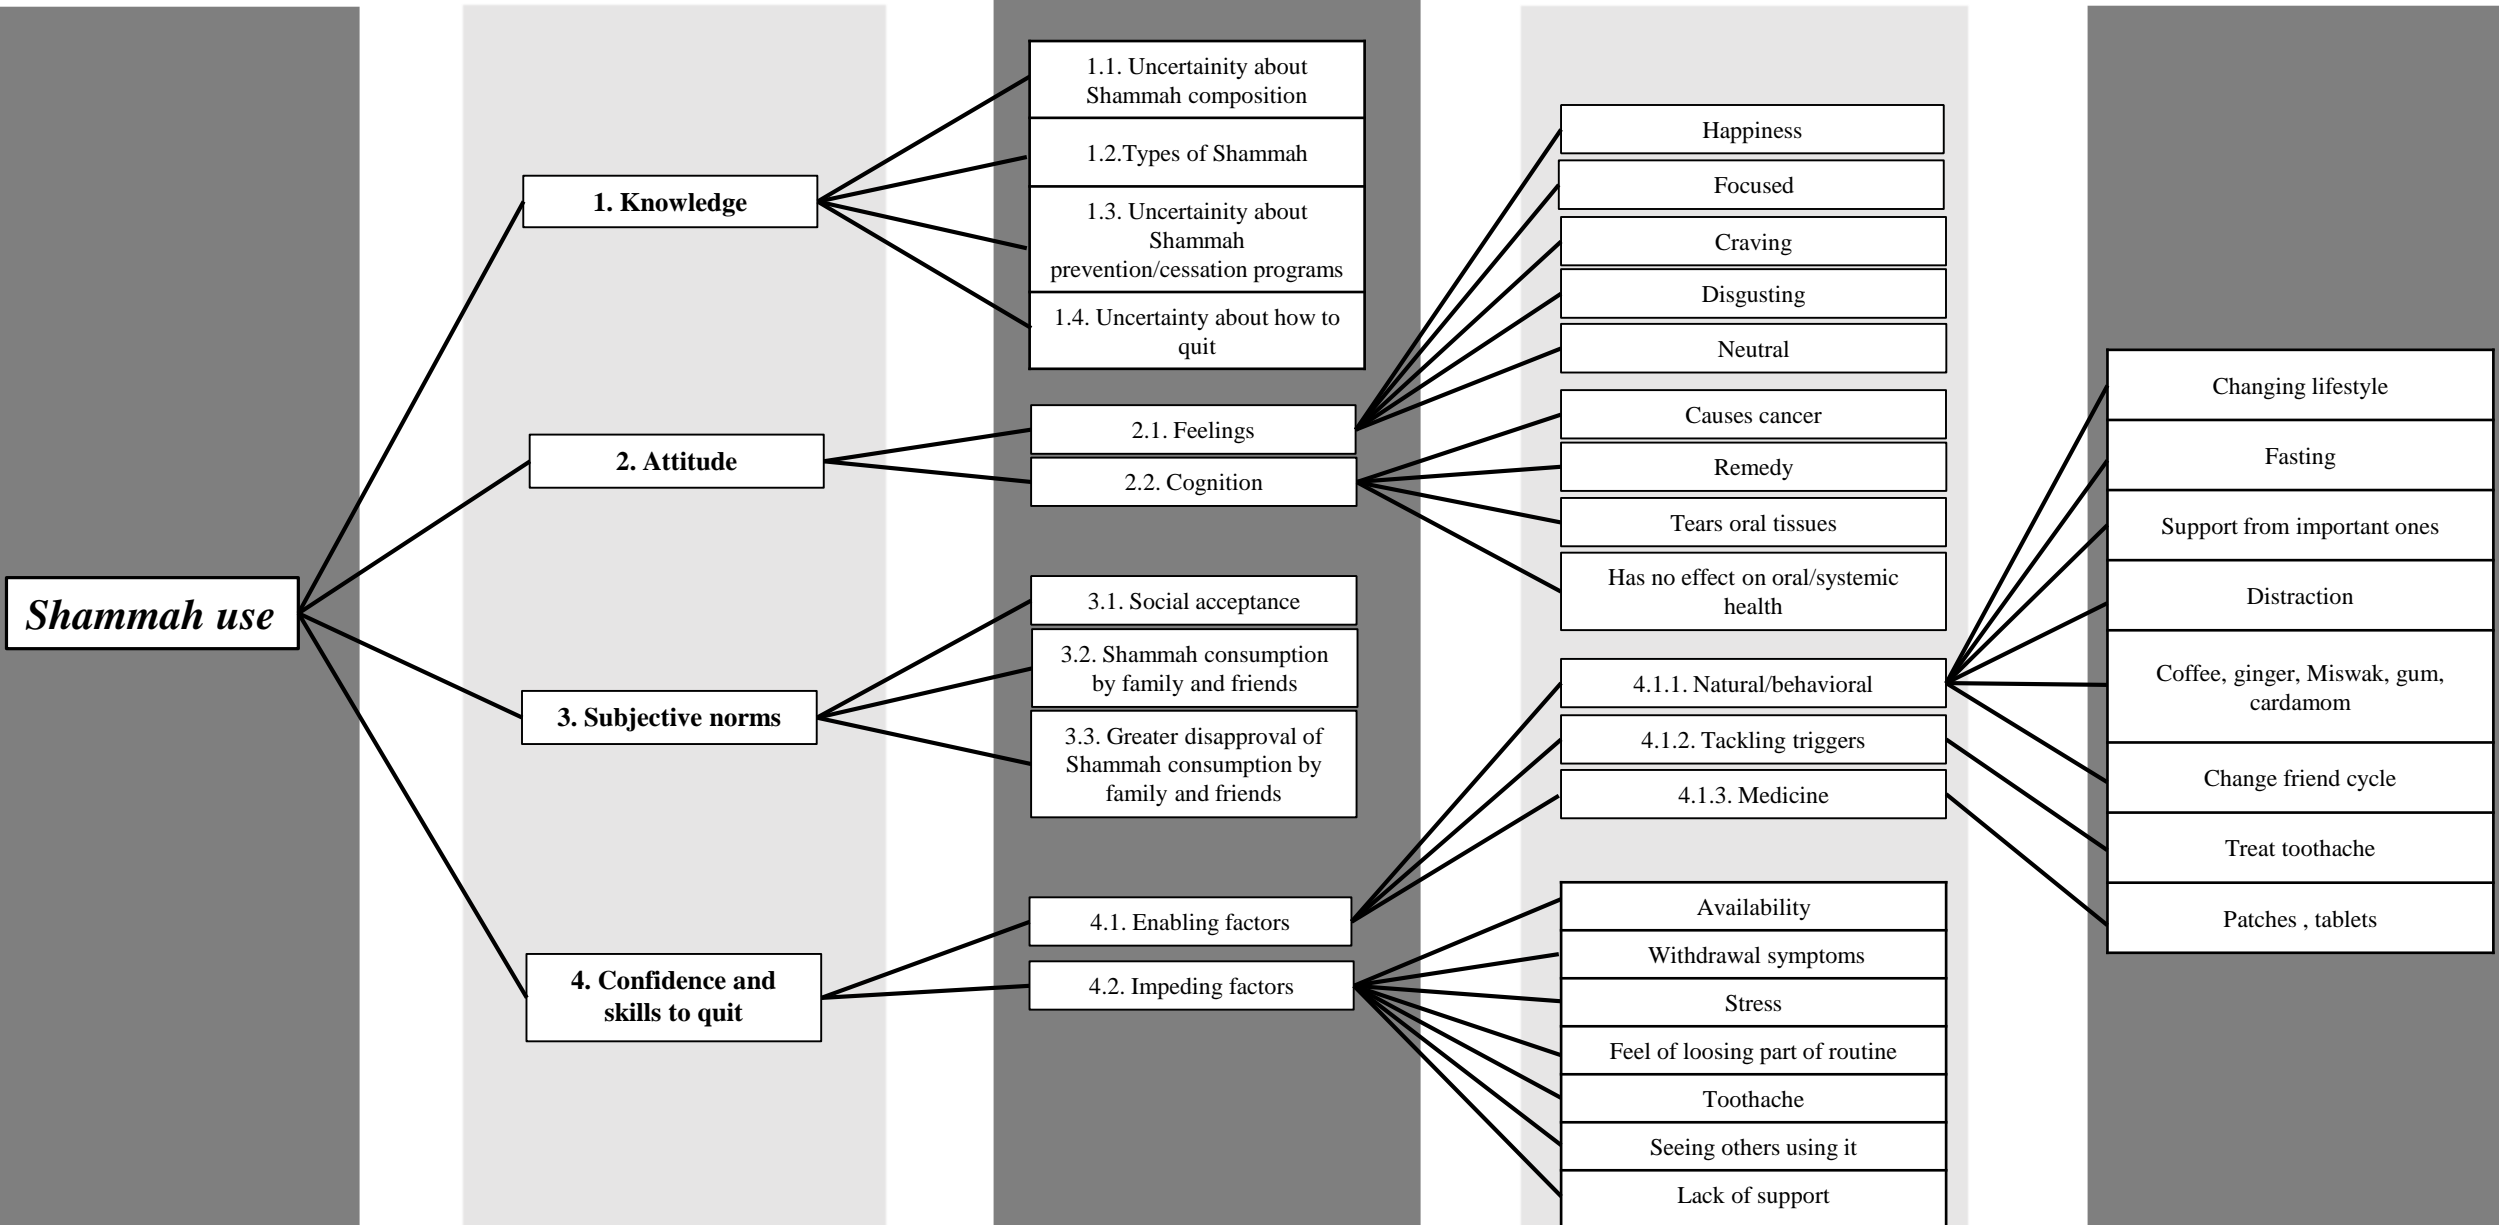

Supplement: 12889_2022_13120_MOESM2_ESM.pdf [file 12889_2022_13120_MOESM2_ESM.pdf]
